# Supplementary material for: Attention and Inhibition Deficits in Narcolepsy Type 1: Behavioral and Electrophysiological Markers
Source: Research Square preprint supplement (doi:10.21203/rs.3.rs-6340580/v1), 2025-05-05
Supplement: Supplementary file 1 [file d4addb244df47df6a0f6b4bf.docx]

**Table S1.** F-values of two-way repeated measure ANOVA comparing Group and Condition for N2 component

| **Variable** | **Group [F(p,)]** | **Condition [F(p,)]** | **Group X Condition [F(p,)]** |
| --- | --- | --- | --- |
| Amplitude | 4.826 (0.031, 0.049) | 58.642 (<0.001, 0.193) | 1.342 (0.251, 0.005) |
| Latency | 3.510 (0.065, 0.041) | 3.273 (0.075, 0.008) | 0.059 (0.809, <0.001) |
