# Supplementary material for: Attention and Inhibition Deficits in Narcolepsy Type 1: Behavioral and Electrophysiological Markers
Source: Research Square preprint supplement (doi:10.21203/rs.3.rs-6340580/v1), 2025-05-05
Supplement: Supplementary file 2 [file e540dc5b2a291325daf76f9e.docx]

**Table S2.** F-values of three-way repeated measure ANOVA comparing Group, Condition and Location for P3 component

| **Variable** | **Group [F(p,)]** | **Condition [F(p,)]** | **Location [F(p,)]** |
| --- | --- | --- | --- |
| Amplitude | 2.328 (0.132, 0.014) | 125.444 (<0.001, 0.207) | 14.429 (<0.001, 0.064) |
| Latency | 3.219 (0.077, 0.009) | 67.926 (<0.001, 0.170) | 0.622 (0.433, 0.003) |
|  | **Group X Condition** | **Group X Location** | **Condition X Location** |
| Amplitude | 0.779 (0.031, 0.002) | 11.669 (0.001, 0.052) | 17.623 (<0.001, 0.028) |
| Latency | 0.222 (0.639, 0.001) | 11.093 (0.001, 0.045) | 5.624 (0.021, 0.024) |
|  | **Group X Condition X Location** | | |
| Amplitude | 5.948 (0.017, 0.010) | | |
| Latency | 7.247 (0.009, 0.030) | | |
